# Supplementary material for: A tunable warm-white-light Sr3Gd(PO4)3:Eu2+,Mn2+phosphor system for LED-based solid-state lighting
Source: Royal Society of Chemistry journal article supplement (doi:10.1039/c1nj20532c), 2011-11-17
Supplement: c1nj20532c.pdf [file c1nj20532c.pdf]

## Supporting Information

**Title:** Tunable Warm-White-Light  $\text{Sr}_3\text{Gd}(\text{PO}_4)_3:\text{Eu}^{2+},\text{Mn}^{2+}$  Phosphor System for LED-based Solid-State Lighting

**Author(s):** Ning Guo<sup>a,b</sup>, Yuhua Zheng<sup>a,b</sup>, Yongchao Jia<sup>a,b</sup>, Hui Qiao<sup>a,b</sup>, and Hongpeng You<sup>a,\*</sup>

<sup>a</sup>State Key Laboratory of Rare Earth Resource Utilization, Changchun Institute of Applied Chemistry, Chinese Academy of Sciences, Changchun 130022, P. R. China.

<sup>b</sup>Graduate University of the Chinese Academy of Sciences, Beijing 100049, P. R. China.

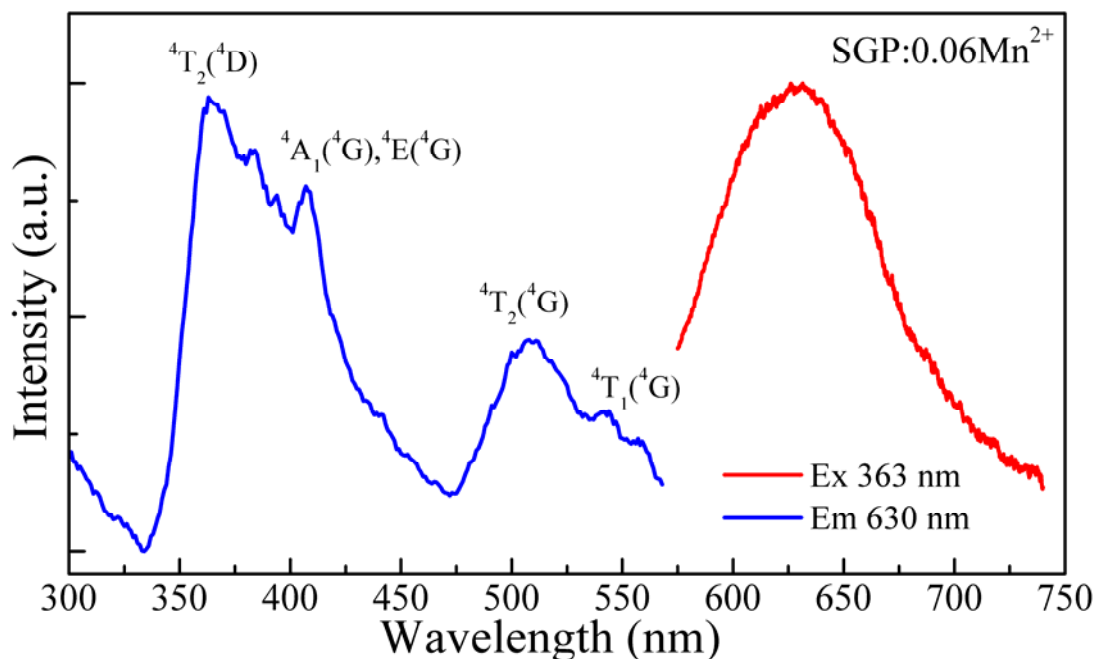

**Figure S1.** Excitation and emission spectra of the SGP:0.06Mn<sup>2+</sup> sample.
